# Supplementary material for: PIE-seq: identifying RNA-binding protein targets by dual RNA-deaminase editing and sequencing
Source: Springer Nature journal article supplement (doi:10.1038/s41467-023-39054-8), 2023-06-06
Supplement: MOESM3 [file 41467_2023_39054_MOESM3_ESM.pdf › 41467_2023_39054_MOESM3_ESM.pdf]

### **Description of Additional Supplementary Files**

**Supplementary Data 1** : Primer sequences for cloning PIE-RBP plasmids and PUM2 RIP-qPCR.

**Supplementary Data 2** : Target sites and target genes for 25 RBPs identified by PIE-Seq in HEK293FT cells. Related to Figure 7 and Supplementary Figure 8.

**Supplementary Data 3** : Enriched sequence motifs for 25 RBPs identified by PIE-Seq, and the comparisons to previously reported ones. Related to Figure 7.
