# Supplementary material for: PIE-seq: identifying RNA-binding protein targets by dual RNA-deaminase editing and sequencing
Source: Nat Commun. 2023 Jun 6;14:3275. doi: 10.1038/s41467-023-39054-8 (PMC10244410; doi:10.1038/s41467-023-39054-8)
Supplement: Supplementary file 8 — Source Data [file 41467_2023_39054_MOESM8_ESM.xlsx]

## Sheet: Figure 1c
Figure 1c
	Groups	A-to-I (%)			C-to-U (%)
		replicate 1	replicate 2	replicate 3	replicate 1	replicate 2	replicate 3	Two tailed T.TEST
	Empty	2	2	2	2	2	1
	Apobec1	2	3	2	8	8	15	0.0212607
	MCP-Apobec1	3	2	2	46	34	40	0.00207528
	MCP-APOBEC3A	5	10	11	51	64	65	0.00061195
	MCP-ADAR2dd	37	20	21	1	3	6	0.0120845
	TadA-TadA*-Apobec1	11	9	10	7	2	1
	TadA-TadA*-MCP	48	42	37	1	2	0	0.000560963
	TadA*-MCP	54	46	NA	2	1	NA	0.000979271
	TadA*(V82G)-MCP	67	62	61	4	3	2	1.04904e-05

## Sheet: Figure 3f
Figure 3f
	Genes	Replicate 1 (log2)	Replicate 2 (log2)	Replicate 3 (log2)
	HES4	-1.32066	-2.26659	-3.70065
	ZBTB48	-1.1953	-4.09385	-1.55177
	FBXO44	-1.29925	-3.09429	-3.01774
	ELF1	4.52048	3.50094	3.19606
	CDKN1B	4.02057	1.0572	2.54284
	NORAD	5.51127	5.69382	6.13594
	PUM1	4.72667	2.71561	2.69555
	TOP2A	2.02934	0.753889	1.61232
	FBXO5	3.85587	3.15712	3.42711
	SEPTIN7	-0.08841	-0.95631	-0.69037
	RNF139	4.3299	3.23389	3.27628
	PPP1CC	2.88508	1.65497	1.57917
	RAD21	1.4168	-0.1867	0.368799
	WTAP	1.17862	-0.14466	0.201203
	WAC	3.76006	2.42722	2.75074
	CDV3	-0.91905	-1.82969	-1.6916
	PUM2	5.07027	3.49555	4.36457
	CTCF	1.9098	1.32642	1.54741
	HNRNPU	0.328133	-0.86833	-0.3749
	RAB14	2.31387	1.70026	2.08368
	PAIP2	0.966767	-0.39494	-0.32937
	MTF2	2.59523	1.00602	2.09374
	PPP1R8	3.15193	1.04629	3.72745
	FBXO28	1.21579	-0.22964	-0.11675
	CHAMP1	2.73052	1.70306	2.02645
	LDHA	0.358848	-0.05039	0.298252
	RSL24D1	1.42634	-0.28155	0.622663
	HSPA1A	4.34624	3.32052	3.77109
	PIM3	-0.91826	-4.00208	-2.27127
	RPL7L1	-1.23463	-4.05818	-2.5694
	TRIM37	-1.04671	-2.10367	-2.11629
	COA7	3.30989	0.337712	0.267282
	SZRD1	1.84624	1.21317	1.4961
	THAP12	-1.01497	-2.02623	-1.36405
	TMEM101	1.94065	1.121	1.62073
	SPOP	-0.62462	-2.10483	-1.30955
	BLM	-0.81971	-2.48456	-1.85695
	WDR48	2.55516	1.72757	1.96077
	RPL15	1.08141	-0.15184	0.509101
	ZNF121	-1.2131	-3.94584	-3.60571
	TRAPPC11	2.37528	1.3556	1.82007
	THUMPD2	0.655575	0.337586	0.93324
	PHAX	-0.45683	-1.05254	-0.93465
	FAM32A	-0.60918	-2.46899	-2.15084
	PLEKHB1	-1.56396	-3.43365	NA

## Sheet: Figure 5e
Figure 5e
	App mRNA level (log2CPM)	NPC			Neuron			p value from Empirical Bayes method in limma package
		Ctrl.CD133	APAD.CD133	PIE.PUM2.CD133	Ctrl.CD24	APAD.CD24	PIE.PUM2.CD24
	App	8.90071	8.92714	8.63041	8.60973	8.6517	8.28078	0.436413

## Sheet: Supplementary Figure 3c
Supplementary Figure 3c
	Gene Region	APAD (%)	PIE-PUM2 (%)
	5'UTR	0.7	1.6
	CDS	6.9	16.3
	3'UTR	88.5	81.2
	Intron	1.2	0.8
	Intergenic	2.7	0

## Sheet: Supplementary Figure 3d
Supplementary Figure 3d
	Target	PUM2.3'UTR			rApobec1		Lenti.3'UTR
	Samples	Mock	APAD_dox.0	PIE-PUM2_dox.0	APAD	PIE-PUM2	APAD_dox.50	APAD_dox.1000	PIE-PUM2_dox.50	PIE-PUM2_dox.1000
	Replicate 1	0.8329	0.799804	0.758547	194.701	131.6	19.5993	10.7407	8.7543	12.3234
	Replicate 2	0.9119	0.73177	0.652757	396.19	161.939	17.4021	18.5984	6.22505	9.91763

## Sheet: Supplementary Figure 3e
Supplementary Figure 3e	Regions with dashed-line were shown in the figure.
	Anti-PUM2
	Anti-LMNB1
	Ladder:LICOR Odyssey Protein Molecular Weight Marker (10-250 KDa), 0.5 ML;LIC-928-40000

## Sheet: Supplementary Figure 4d
Supplementary Figure 4d
	Target genes	downsampling to 10%	downsampling to 25%	downsampling to 40%	downsampling to 50%	downsampling to 75%	1
	1 cells	1429	3248	4020	4294	4641	4852
	10 cells	1874	3523	4338	4679	5215	5551

## Sheet: Supplementary Figure 6c
Supplementary Figure 6c
	Gene Region	PIE-SRSF1	PIE-SRSF2	PIE-SRSF3
	5'UTR	2.9	2.9	2.4
	CDS	45.6	41.9	27.3
	3'UTR	51.2	54.8	70
	Intron	0.3	0.3	0.3

## Sheet: Supplementary Figure 8d
Supplementary Figure 8d	RBP	PIE-Seq_targets	Already_Reported	PIE-Seq_Ratio	Total Reported_targets	Reported_ratio	Reference
	PUM2	1975	1362	0.68962	2798, 2847, 2673, 441	31.92%, 29.22%, 27.01, 30.16%	Ref 1,2,3,4
	NOVA1	1965	1190	0.605598	5916, 2594	17.49%, 21.82%	Ref 5,6
	FMR1	956	652	0.682008	4183	0.155869	Ref 7
	LIN28A	3377	875	0.259106	240, 1624	55%, 48.58%	Ref 8,9
	LIN28B	2018	1082	0.536174	3950	0.273924	Ref 9
	IGF2BP1	911	828	0.908891	6922, 3509	11.49%, 16.44%	Ref 1,10
	IGF2BP2	1678	1232	0.734207	5311	0.231971	Ref 1
	STAU2	1066	557	0.522514	2291	0.243125	Ref 11
	YTHDF1	614	401	0.653094	4556	0.0880158	Ref 12
	YTHDF2	733	480	0.654843	6502	0.0738234	Ref 13
	TARDBP	3010	1290	0.428571	5555	0.232223	Ref 14
	FUBP1	171	124	0.725146	4486	0.0276416	Ref 15
	CELF1	4288	2955	0.689132	5132, 2486	46.67%, 51.17%	Ref 15,16
	CELF2	4439	3751	0.84501	8650, 2532	42.42%, 47.83%	Ref 17,18
	KHDRBS1	4810	4013	0.834304	8297433	48.37%, 60.05%	Ref 17,19
	KHDRBS2	4605	2588	0.561998	4875	0.530872	Ref 15
	KHDRBS3	3506	3063	0.873645	8670	0.353287	Ref 17
	SRSF1	4104	1457	0.355019	1008, 1071, 2823, 230	38.89%, 47.71%, 39.07%, 38.70%	Ref 19, 20, 21
	QKI-6	1608	691	0.429726	2878, 2349	18.17%, 16.05%	Ref 19, 1
	Reference
	Ref 1	Hafner, M. et al. Transcriptome-wide identification of RNA-binding protein and microRNA target sites by PAR-CLIP. Cell 141, 129-141, doi:10.1016/j.cell.2010.03.009 (2010).
	Ref 2	Sternburg, E. L., Estep, J. A., Nguyen, D. K., Li, Y. & Karginov, F. V. Antagonistic and cooperative AGO2-PUM interactions in regulating mRNAs. Scientific reports 8, 1-13 (2018).
	Ref 3	Yamada, T. et al. Systematic analysis of targets of pumilio-mediated mRNA decay reveals that PUM1 repression by DNA damage activates translesion synthesis. Cell reports 31, 107542 (2020).
	Ref 4	Galgano A, Forrer M, Jaskiewicz L, Kanitz A, Zavolan M, Gerber AP. 2008. Comparative analysis of mRNA targets for human PUF-family proteins suggests extensive interaction with the miRNA regulatory system. PloS one 3: e3164.
	Ref 5	Saito, Y. et al. NOVA2-mediated RNA regulation is required for axonal pathfinding during development. Elife 5, e14371 (2016).
	Ref 6	Trujillo, C. A. et al. Reintroduction of the archaic variant of NOVA1 in cortical organoids alters neurodevelopment. Science 371, eaax2537 (2021).
	Ref 7	Ascano, M. et al. FMRP targets distinct mRNA sequence elements to regulate protein expression. Nature 492, 382-386 (2012).
	Ref 8	Cho, Jun, et al. "LIN28A is a suppressor of ER-associated translation in embryonic stem cells." Cell 151.4 (2012): 765-777.
	Ref 9	Hafner, Markus, et al. "Identification of mRNAs bound and regulated by human LIN28 proteins and molecular requirements for RNA recognition." Rna 19.5 (2013): 613-626.
	Ref 10	Huang, H. et al. Recognition of RNA N 6-methyladenosine by IGF2BP proteins enhances mRNA stability and translation. Nature cell biology 20, 285-295 (2018).
	Ref 11	Bajaj, J. et al. An in vivo genome-wide CRISPR screen identifies the RNA-binding protein Staufen2 as a key regulator of myeloid leukemia. Nature cancer 1, 410-422 (2020).
	Ref 12	Wang, X. et al. N6-methyladenosine modulates messenger RNA translation efficiency. Cell 161, 1388-1399 (2015).
	Ref 13	Wang, X. et al. N6-methyladenosine-dependent regulation of messenger RNA stability. Nature 505, 117-120 (2014).
	Ref 14	Sephton, C. F. et al. Identification of Neuronal RNA Targets of TDP-43-containing Ribonucleoprotein Complexes. Journal of biological chemistry 286, 1204-1215 (2011).
	Ref 15	Porter, D. F. et al. easyCLIP analysis of RNA-protein interactions incorporating absolute quantification. Nature communications 12, 1-16 (2021).
	Ref 16	Le Tonquèze, Olivier, et al. "Identification of CELF1 RNA targets by CLIP-seq in human HeLa cells." Genomics data 8 (2016): 97-103.
	Ref 17	Maticzka, Daniel, et al. "uvCLAP is a fast and non-radioactive method to identify in vivo targets of RNA-binding proteins." Nature communications 9.1 (2018): 1142.
	Ref 18	Chen, Lizhen, et al. "CELF RNA binding proteins promote axon regeneration in C. elegans and mammals through alternative splicing of Syntaxins." Elife 5 (2016): e16072.
	Ref 19	Van Nostrand, Eric L., et al. "A large-scale binding and functional map of human RNA-binding proteins." Nature 583.7818 (2020): 711-719.
	Ref 20	Sheng, Junxiu, et al. "SRSF1 modulates PTPMT1 alternative splicing to regulate lung cancer cell radioresistance." EBioMedicine 38 (2018): 113-126.
	Ref 21	Pandit, Shatakshi, et al. "Genome-wide analysis reveals SR protein cooperation and competition in regulated splicing." Molecular cell 50.2 (2013): 223-235.

## Sheet: Supplementary Figure 8e
Supplementary Figure 8e	Kinds of RBPs per Target Gene	1	2	3	4	5	6	7	8	9	10	11	12	13	14	15	16	17	18	19	20	21	22	23
	Number of Target Genes	1086	1606	1788	2112	2245	2496	3031	3024	3240	3930	3905	3828	3874	3934	4275	3472	3281	3060	2033	980	378	154	23
